# Supplementary material for: Individual and Combined Effects of Predatory Bug Engytatus nicotianae and Trichoderma atroviride in Suppressing the Tomato Potato Psyllid Bactericera cockerelli in Greenhouse Grown Tomatoes
Source: MDPI journal article supplement (doi:10.3390/agronomy13123019), 2023-12-08
Supplement: s1 [file s1]

**Supplementary Table S1.** Mixed-effects model using Poisson regression of TPP counts for eggs, nymphs, adults, and TPP infested leaves, including the individual effect of each treatment, time and their interactions.

|                          | Count of TPP:        |                      |                      |                      |
|--------------------------|----------------------|----------------------|----------------------|----------------------|
|                          | Eggs                 | Nymphs               | Adults               | Leaves               |
| <i>Trichoderma</i>       | -0.496<br>(1.076)    | -0.791<br>(1.634)    | -0.841<br>(0.777)    | -0.344<br>(0.833)    |
| <i>Engytatus</i>         | -4.174***<br>(1.229) | -4.259**<br>(1.857)  | -3.201***<br>(0.851) | -2.834***<br>(0.996) |
| Combined                 | -4.304***<br>(1.175) | -9.270***<br>(2.069) | -4.070***<br>(0.864) | -2.886***<br>(0.988) |
| Days                     | 0.066***<br>(0.001)  | 0.066***<br>(0.001)  | 0.077***<br>(0.002)  | 0.066***<br>(0.003)  |
| <i>Trichoderma</i> *Days | 0.0005<br>(0.002)    | -0.006***<br>(0.001) | 0.004<br>(0.003)     | -0.001<br>(0.005)    |
| <i>Engytatus</i> *Days   | -0.034***<br>(0.003) | -0.055***<br>(0.003) | -0.024***<br>(0.006) | -0.021**<br>(0.008)  |
| Combined*Days            | -0.009***<br>(0.003) | 0.003<br>(0.003)     | -0.012*<br>(0.006)   | -0.026***<br>(0.008) |
| Intercept                | 1.088<br>(1.296)     | 1.306<br>(1.961)     | 0.385<br>(0.879)     | -0.794<br>(0.989)    |
| Block Controls           | YES                  | YES                  | YES                  | YES                  |
| Observations             | 252                  | 252                  | 252                  | 252                  |
| Groups                   | 28                   | 28                   | 28                   | 28                   |
| SD of Random Intercepts  | 2.007                | 3.032                | 1.419                | 1.482                |
| Log Likelihood           | -3,883.646           | -2,482.526           | -1,245.393           | -386.504             |
| Akaike Inf. Crit.        | 7,797.292            | 4,995.052            | 2,520.787            | 803.008              |

Standard errors in parentheses; \*  $p < 0.10$ , \*\*  $p < 0.05$ , \*\*\*  $p < 0.01$ ; The Poisson coefficients are in the log of expected count scale. Exponentiating these coefficients will give incident rate ratios.

**Supplementary Table S2.** Tentative identification and quantification of compounds present in the headspace samples of tomato plants (ng x gDW<sup>-1</sup> x h<sup>-1</sup>). UIP= Uninfested plant, TRI = *Trichoderma atroviride*, TPP = tomato potato psyllid (*Bactericera cockerelli*), E= *Engytatus nicotianae* (predatory bug).

|                                                          | UIP    |        | TRI    |       | TPP    |       | TRI+TPP |        | TPP+E  |       | TRI+TPP+E |       |
|----------------------------------------------------------|--------|--------|--------|-------|--------|-------|---------|--------|--------|-------|-----------|-------|
| Compound ID and abbreviation                             | MEAN   | SEM    | MEAN   | SEM   | MEAN   | SEM   | MEAN    | SEM    | MEAN   | SEM   | MEAN      | SEM   |
| Hexanal (Hex)                                            | 0.027  | 0.013  | 0.023  | 0.018 | 0.019  | 0.007 | 0.026   | 0.019  | 0.029  | 0.006 | 0.015     | 0.004 |
| Butyl acetate (BAc)                                      | 0.095  | 0.024  | 0.133  | 0.044 | 0.119  | 0.029 | 0.116   | 0.028  | 0.153  | 0.036 | 0.114     | 0.037 |
| Heptanol (Hep)                                           | 0.048  | 0.017  | 0.052  | 0.015 | 0.030  | 0.014 | 0.045   | 0.013  | 0.023  | 0.011 | 0.032     | 0.007 |
| $\alpha$ -Thujene (aThuj)                                | 0.048  | 0.013  | 0.037  | 0.011 | 0.022  | 0.007 | 0.036   | 0.015  | 0.045  | 0.004 | 0.032     | 0.013 |
| $\alpha$ -Pinene (aPin)                                  | 2.381  | 0.525  | 1.545  | 0.311 | 1.460  | 0.212 | 2.051   | 0.619  | 1.995  | 0.273 | 1.887     | 0.354 |
| 3,7,7-Trimethyl-1,3,5-cycloheptatriene (HepTri)          | 0.954  | 0.237  | 0.455  | 0.103 | 0.519  | 0.096 | 0.947   | 0.288  | 0.882  | 0.128 | 0.789     | 0.175 |
| Sabinene (Sab)                                           | 0.114  | 0.023  | 0.083  | 0.015 | 0.098  | 0.016 | 0.110   | 0.034  | 0.103  | 0.012 | 0.105     | 0.019 |
| $\beta$ -Pinene (bPin)                                   | 0.136  | 0.029  | 0.109  | 0.020 | 0.102  | 0.019 | 0.113   | 0.016  | 0.123  | 0.015 | 0.107     | 0.017 |
| $\beta$ -Myrcene (bMyr)                                  | 0.207  | 0.056  | 0.207  | 0.048 | 0.134  | 0.039 | 0.260   | 0.116  | 0.143  | 0.032 | 0.191     | 0.058 |
| 2-Carene (X2car)                                         | 19.119 | 4.441  | 13.226 | 2.881 | 11.417 | 1.622 | 15.990  | 4.728  | 15.662 | 2.235 | 14.976    | 3.109 |
| $\alpha$ -Phellandrene (aPhel)                           | 2.706  | 0.634  | 1.776  | 0.385 | 1.648  | 0.240 | 2.360   | 0.722  | 2.258  | 0.348 | 2.141     | 0.444 |
| 3-Carene (X3car)                                         | 0.086  | 0.027  | 0.074  | 0.016 | 0.059  | 0.013 | 0.094   | 0.025  | 0.081  | 0.010 | 0.081     | 0.021 |
| 4-Carene (C4Car)                                         | 0.922  | 0.238  | 0.586  | 0.142 | 0.532  | 0.089 | 0.827   | 0.273  | 0.764  | 0.138 | 0.735     | 0.151 |
| p-Cymene (pCym)                                          | 0.118  | 0.023  | 0.095  | 0.026 | 0.076  | 0.022 | 0.100   | 0.030  | 0.121  | 0.017 | 0.115     | 0.025 |
| $\beta$ -Phellandrene (bPhel)                            | 56.395 | 12.538 | 39.855 | 8.569 | 35.497 | 4.974 | 48.476  | 13.723 | 48.259 | 6.634 | 45.154    | 9.730 |
| Terpinolene (Terp)                                       | 0.257  | 0.058  | 0.203  | 0.045 | 0.149  | 0.018 | 0.206   | 0.059  | 0.199  | 0.031 | 0.197     | 0.038 |
| (Z)- $\beta$ -Ocimene (ZBOci)                            | 0.107  | 0.044  | 0.071  | 0.019 | 0.041  | 0.019 | 0.089   | 0.044  | 0.049  | 0.016 | 0.061     | 0.027 |
| $\gamma$ -Terpinene (gTerp)                              | 0.160  | 0.054  | 0.144  | 0.047 | 0.071  | 0.020 | 0.121   | 0.036  | 0.112  | 0.026 | 0.182     | 0.053 |
| 4-Methyl-3-(1-methylethylidene)-1-cyclohexene (Cyclohex) | 0.241  | 0.054  | 0.175  | 0.034 | 0.153  | 0.021 | 0.206   | 0.062  | 0.211  | 0.036 | 0.172     | 0.043 |
| Undecane (Undec)                                         | 0.139  | 0.041  | 0.168  | 0.026 | 0.146  | 0.045 | 0.153   | 0.023  | 0.187  | 0.041 | 0.127     | 0.017 |
| 6-Isopropylidene-1-methylbicyclo[3.1.0]hexane (X6Iso)    | 0.103  | 0.021  | 0.085  | 0.025 | 0.054  | 0.019 | 0.103   | 0.032  | 0.087  | 0.011 | 0.049     | 0.015 |
| Camphor (Camph)                                          | 0.038  | 0.016  | 0.028  | 0.011 | 0.020  | 0.020 | 0.049   | 0.018  | 0.035  | 0.012 | 0.019     | 0.009 |
| (E)-3(10)-Caren-4-ol (Caren)                             | 0.045  | 0.014  | 0.035  | 0.013 | 0.031  | 0.011 | 0.027   | 0.015  | 0.053  | 0.014 | 0.039     | 0.016 |

|                                              |               |               |               |               |               |              |               |               |               |               |               |               |
|----------------------------------------------|---------------|---------------|---------------|---------------|---------------|--------------|---------------|---------------|---------------|---------------|---------------|---------------|
| 3,9-Epoxy-p-menth-1-ene (Menth)              | 0.070         | 0.020         | 0.071         | 0.025         | 0.054         | 0.021        | 0.078         | 0.026         | 0.087         | 0.012         | 0.049         | 0.015         |
| Isothujol (Isothuj)                          | 0.111         | 0.022         | 0.103         | 0.032         | 0.083         | 0.017        | 0.082         | 0.027         | 0.103         | 0.015         | 0.071         | 0.035         |
| $\delta$ -Elemene (dElem)                    | 0.267         | 0.080         | 0.239         | 0.065         | 0.211         | 0.036        | 0.270         | 0.092         | 0.255         | 0.042         | 0.261         | 0.114         |
| Copaene (Cop)                                | 0.048         | 0.009         | 0.063         | 0.014         | 0.045         | 0.011        | 0.071         | 0.017         | 0.053         | 0.011         | 0.059         | 0.015         |
| $\beta$ -Elemene (bElem)                     | 0.015         | 0.011         | 0.024         | 0.011         | 0.027         | 0.007        | 0.033         | 0.014         | 0.035         | 0.007         | 0.017         | 0.017         |
| ( <i>E</i> )- $\beta$ -Caryophyllene (EBCar) | 1.330         | 0.432         | 1.100         | 0.275         | 1.078         | 0.066        | 1.371         | 0.419         | 1.370         | 0.279         | 1.256         | 0.460         |
| Isodene (Isoled)                             | 0.026         | 0.012         | 0.033         | 0.009         | 0.032         | 0.010        | 0.028         | 0.014         | 0.025         | 0.008         | 0.028         | 0.012         |
| Humulene (Hum)                               | 0.246         | 0.074         | 0.214         | 0.051         | 0.198         | 0.018        | 0.255         | 0.073         | 0.261         | 0.051         | 0.237         | 0.088         |
| Germacrene D (GermD)                         | 0.033         | 0.019         | 0.035         | 0.020         | 0.032         | 0.014        | 0.030         | 0.011         | 0.040         | 0.017         | 0.057         | 0.019         |
| Fanesyl Cyanide (FarCya)                     | 0.554         | 0.216         | 0.581         | 0.207         | 0.441         | 0.089        | 0.357         | 0.083         | 0.305         | 0.078         | 0.390         | 0.097         |
| <b>Total</b>                                 | <b>87.144</b> | <b>19.657</b> | <b>61.626</b> | <b>13.152</b> | <b>54.598</b> | <b>7.455</b> | <b>75.080</b> | <b>21.374</b> | <b>74.106</b> | <b>10.256</b> | <b>69.746</b> | <b>14.965</b> |
